# Supplementary material for: Prognostic role of the systemic immune–inflammation index in upper tract urothelial carcinoma treated with radical nephroureterectomy: results from a large multicenter international collaboration
Source: Springer Nature journal article supplement (doi:10.1007/s00262-021-02884-w), 2021-02-16

Supplementary Figure 1

Decision curve analysis for additional net-benefit of preoperative systemic immune-inflammation index after being included to a basic model (consisting of age, gender, location, bladder carcinoma history, and architecture) for prediction of non-organ confined disease and muscle invasive disease

(A) Non-organ confined disease

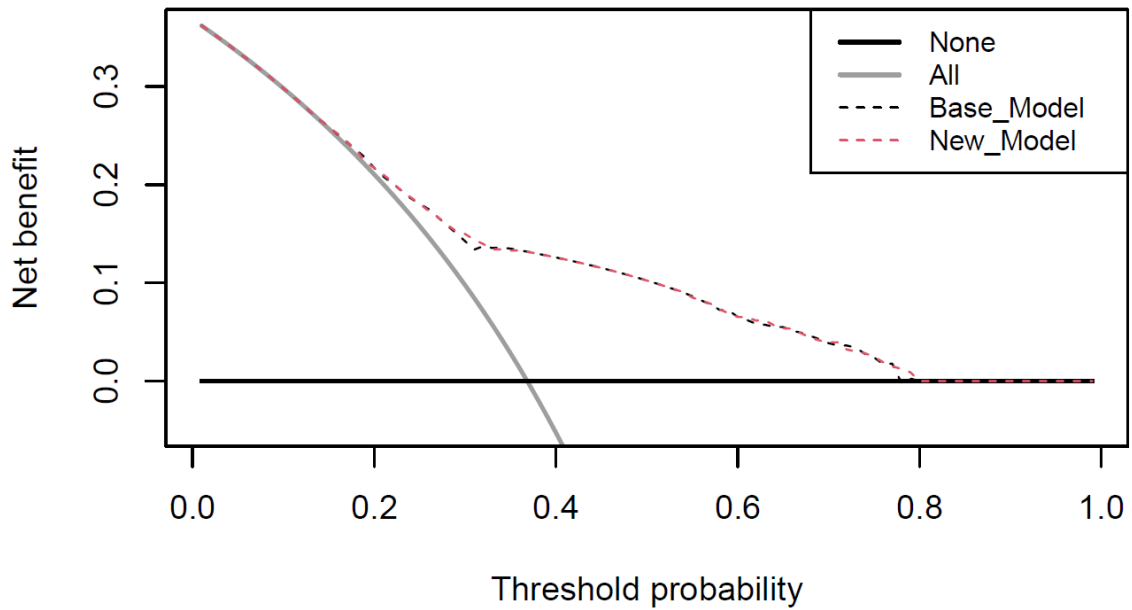

(B) Muscle invasive disease

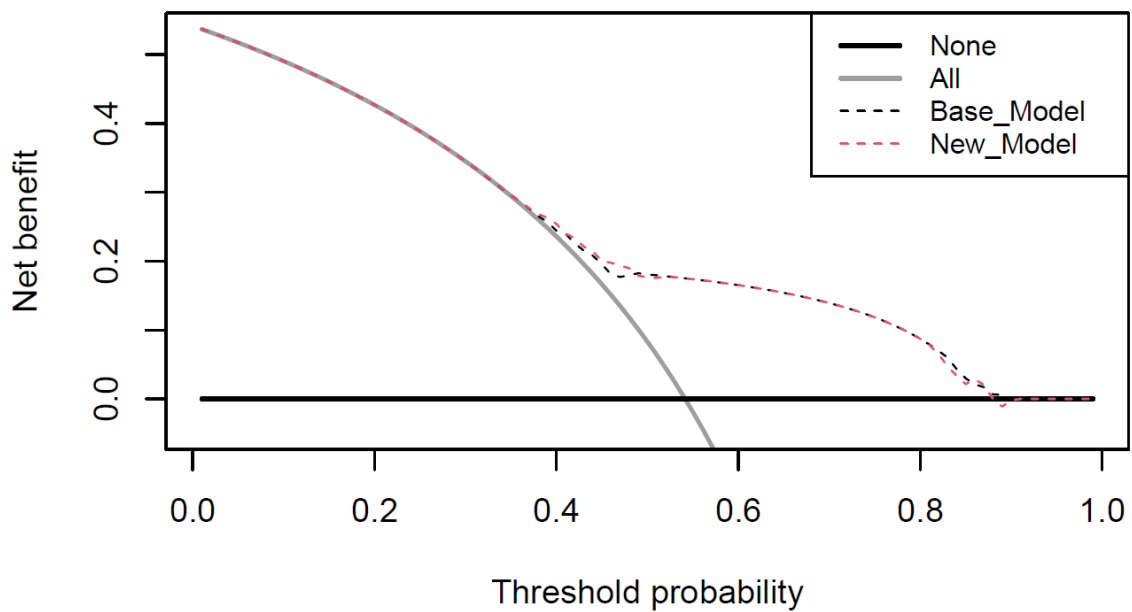

Supplement: MOESM1 [file 18864950]
