# Supplementary material for: Prognostic role of the systemic immune–inflammation index in upper tract urothelial carcinoma treated with radical nephroureterectomy: results from a large multicenter international collaboration
Source: Springer Nature journal article supplement (doi:10.1007/s00262-021-02884-w), 2021-02-16

## Supplementary Figure 2

Decision curve analyses for additional net-benefit of preoperative systemic immune-inflammation index after being included to a basic model (consisting of established histopathological variables) for prediction of recurrence-free survival, cancer-specific survival and overall survival

### (A) Recurrence-free survival

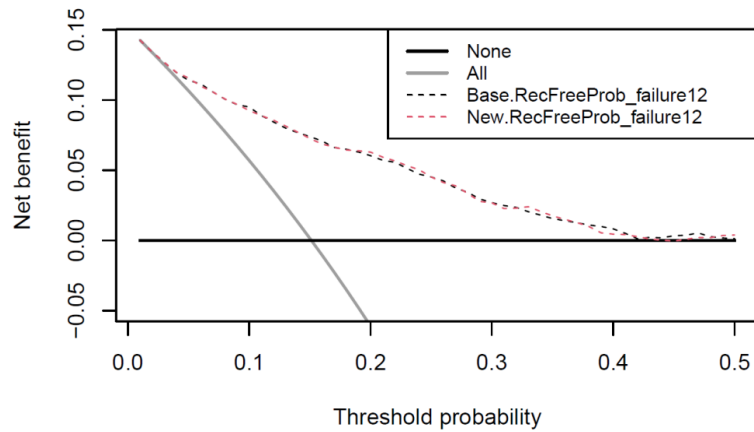

### (B) Cancer-specific survival

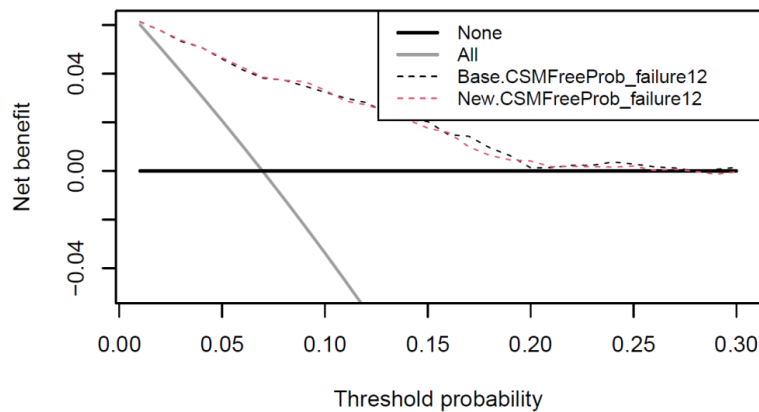

### (C) Overall survival

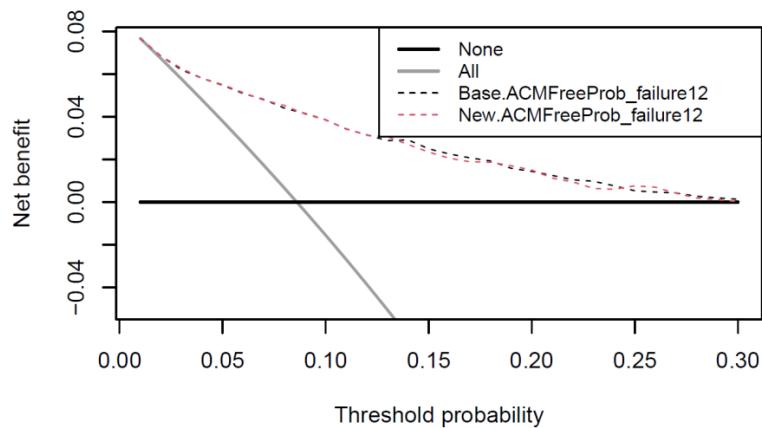

Supplement: MOESM2 [file 18864950]
