# Supplementary material for: Prognostic role of the systemic immune–inflammation index in upper tract urothelial carcinoma treated with radical nephroureterectomy: results from a large multicenter international collaboration
Source: Springer Nature journal article supplement (doi:10.1007/s00262-021-02884-w), 2021-02-16

Supplementary Figure 3

Kaplan Meier estimates of oncological outcomes stratified by systemic immune-inflammation index (SII) in patients with upper tract urothelial carcinoma treated with radical nephroureterectomy (RNU)

(A) Recurrence-free survival (RFS) in ureter tumor

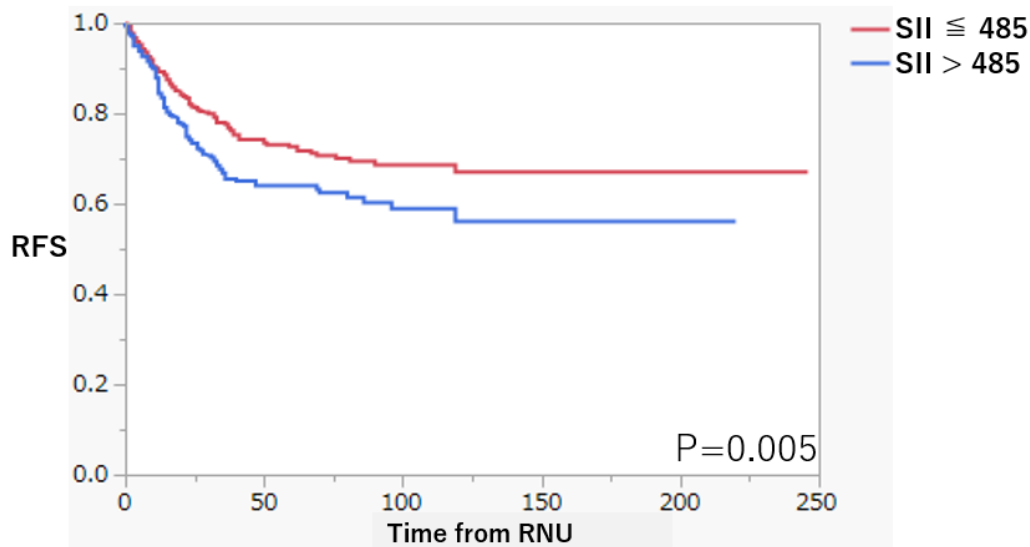

(B) Cancer-specific survival (CSS) in ureter tumor

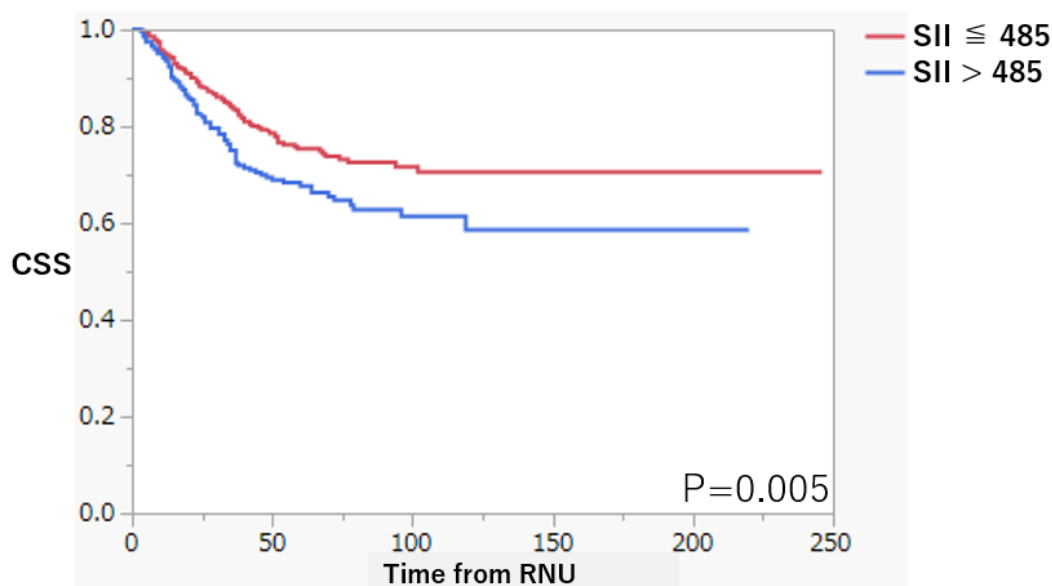

(C) Overall survival (OS) in ureter tumor

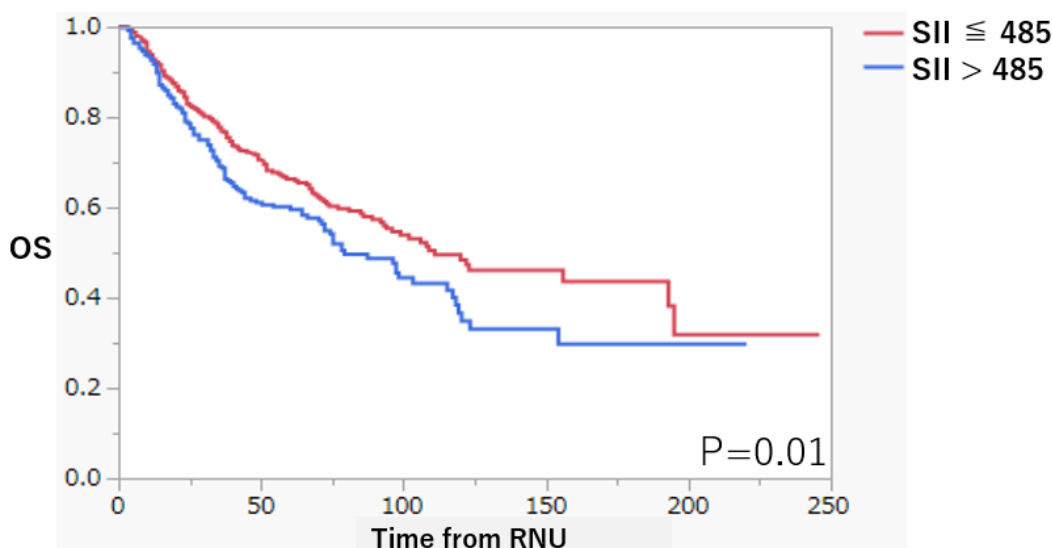

(D) RFS in renal tumor

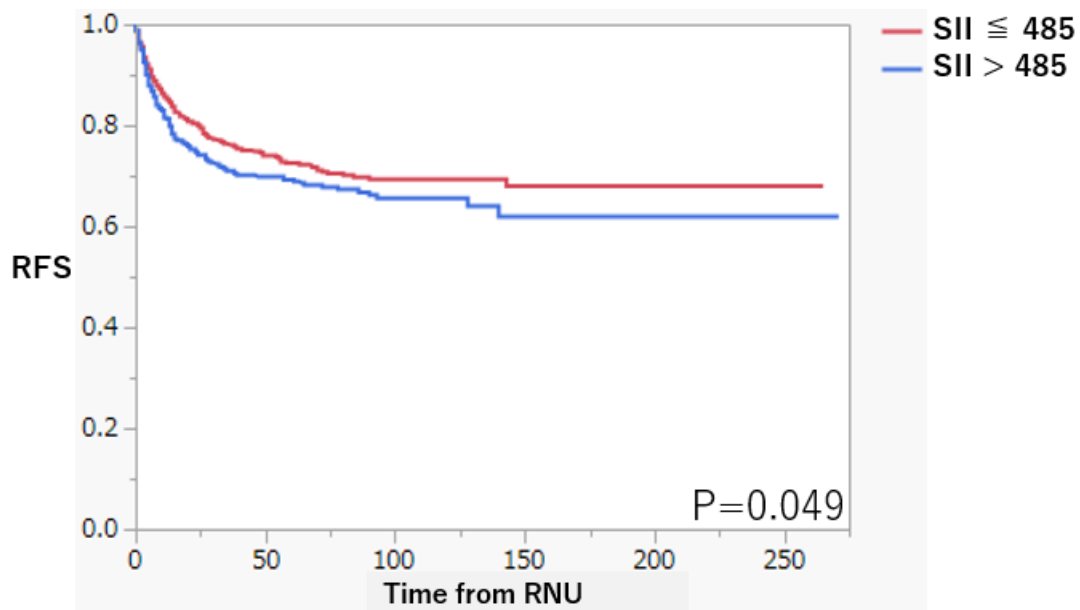

(E) CSS in renal tumor

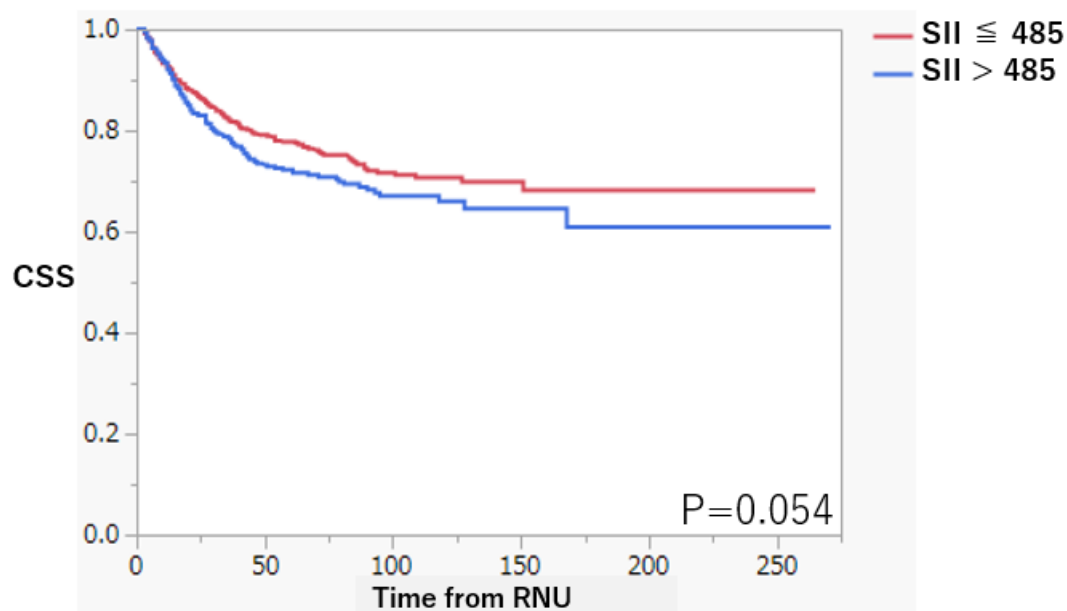

(F) OS in renal tumor

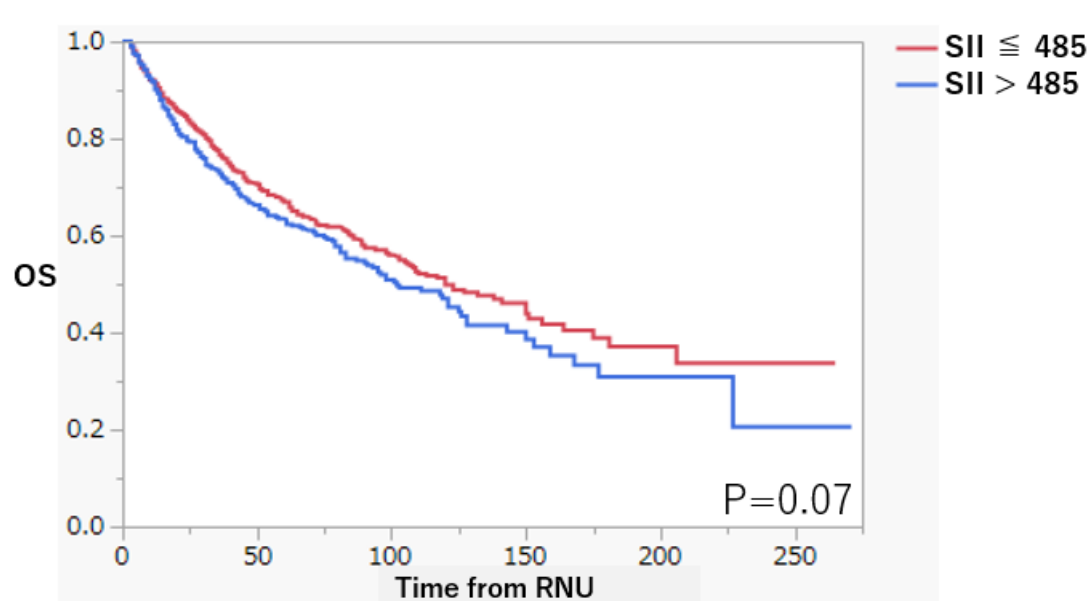

Supplement: MOESM3 [file 18864950]
