# Supplementary material for: Prognostic role of the systemic immune–inflammation index in upper tract urothelial carcinoma treated with radical nephroureterectomy: results from a large multicenter international collaboration
Source: Springer Nature journal article supplement (doi:10.1007/s00262-021-02884-w), 2021-02-16
Supplement: MOESM4 [file 18864950]

Supplementary Table 1

Cox regression analyses predicting survival outcomes by tumor location (Adjusting age, gender, multifocality, necrosis, LVI, grade, stage, architecture, CIS, and AC)

| Ureter tumor                                                                                                                                                                                                                                                                                                                                               |                  |             |                  |             |                  |             |
|------------------------------------------------------------------------------------------------------------------------------------------------------------------------------------------------------------------------------------------------------------------------------------------------------------------------------------------------------------|------------------|-------------|------------------|-------------|------------------|-------------|
|                                                                                                                                                                                                                                                                                                                                                            | CSS              |             | OS               |             | RFS              |             |
|                                                                                                                                                                                                                                                                                                                                                            | Multivariable    |             | Multivariable    |             | Multivariable    |             |
|                                                                                                                                                                                                                                                                                                                                                            | HR (95% CI)      | <i>P</i>    | HR (95% CI)      | <i>P</i>    | HR (95% CI)      | <i>P</i>    |
| SII                                                                                                                                                                                                                                                                                                                                                        | 1.44 (1.08-1.91) | <b>0.01</b> | 1.29 (1.03-1.63) | <b>0.03</b> | 1.37 (1.06-1.78) | <b>0.02</b> |
| C index with SII                                                                                                                                                                                                                                                                                                                                           | 0.78             |             | 0.73             |             | 0.76             |             |
| C index without SII                                                                                                                                                                                                                                                                                                                                        | 0.77             |             | 0.73             |             | 0.76             |             |
| Renal tumor                                                                                                                                                                                                                                                                                                                                                |                  |             |                  |             |                  |             |
|                                                                                                                                                                                                                                                                                                                                                            | CSS              |             | OS               |             | RFS              |             |
|                                                                                                                                                                                                                                                                                                                                                            | Multivariable    |             | Multivariable    |             | Multivariable    |             |
|                                                                                                                                                                                                                                                                                                                                                            | HR (95% CI)      | <i>P</i>    | HR (95% CI)      | <i>P</i>    | HR (95% CI)      | <i>P</i>    |
| SII                                                                                                                                                                                                                                                                                                                                                        | 1.12 (0.90-1.39) | 0.31        | 1.13 (0.96-1.35) | 0.15        | 1.10 (0.90-1.33) | 0.36        |
| <p>Bold <i>P</i> values are considered statistically significant (<i>P</i> value &lt; .05).</p> <p>Abbreviations: CI = confidence interval; CIS = carcinoma in situ; CSS = cancer-specific survival; HR = hazard ratio; LVI = lymphovascular invasion; OS = overall survival; RFS = recurrence-free survival; SII = systemic immune-inflammation index</p> |                  |             |                  |             |                  |             |
